# Supplementary material for: Realizing Scalable Nano-SiO2-Aerogel-Reinforced Composite Polymer Electrolytes with High Ionic Conductivity via Rheology-Tuning UV Polymerization
Source: MDPI journal article supplement (doi:10.3390/molecules28020756), 2023-01-12
Supplement: s1 [file s1]

## Supplementary Materials

# Realizing Scalable Nano-SiO<sub>2</sub>-Aerogel-Reinforced Composite Polymer Electrolytes with High Ionic Conductivity via Rheology Tuning UV Polymerization

Mianrui Li <sup>†</sup>, Shengguang Qi <sup>†</sup>, Shulian Li and Li Du <sup>\*</sup>

Guangdong Provincial Key Laboratory of Fuel Cell Technology, School of Chemistry and Chemical Engineering, South China University of Technology, Guangzhou 510641, People's Republic of China;

202120123902@mail.scut.edu.cn (M.L.); samuel\_qsg@aliyun.com (S.Q.);

shilling07324@163.com (S.L.);

<sup>\*</sup> Correspondence: duli@scut.edu.cn

<sup>†</sup> These authors contributed equally to this work.

**Table S1.** The comparison for the electrochemical performance of polymer solid state electrolytes.

| Polymer solid state electrolyte           | Fabrication method                           | Facile Scalable Yes(Y) or No(N) | Temp. (°C) | $\sigma$ (mS cm <sup>-1</sup> ) | Current density /cycle time (Li//Li symmetric cell) | Retention rate /Cycle number/ C rate (LiFePO <sub>4</sub> //Li cell) | Ref.      |
|-------------------------------------------|----------------------------------------------|---------------------------------|------------|---------------------------------|-----------------------------------------------------|----------------------------------------------------------------------|-----------|
| PEG/LiTFSI/SiO <sub>2</sub>               | In-situ polymerization-induced self-assembly | N                               | 26         | 0.17                            | 0.1 mA cm <sup>-2</sup> /600 h                      | 68.1%/300/0.2 C                                                      | [1]       |
| PCL/LiTFSI/Al <sub>2</sub> O <sub>3</sub> | Solution casting                             | Y                               | 60         | 0.05                            | 0.1 mA cm <sup>-2</sup> /500 h                      | 81.3%/500/1.0 C                                                      | [2]       |
| PEO/LiTFSI/MnO <sub>2</sub>               | Solution casting                             | Y                               | 30         | 0.02                            | 0.1 mA cm <sup>-2</sup> /800 h                      | 86.7%/300/0.5 C (60°C)                                               | [3]       |
| PEG/LiTFSI/PILs                           | In-situ thermal polymerization               | N                               | 25         | 0.10                            | 0.1 mA cm <sup>-2</sup> /2400 h                     | 93.8%/150/0.2 C                                                      | [4]       |
| PEO/LiTFSI/IL                             | Solution casting                             | Y                               | 40         | 0.66                            | 0.1 mA cm <sup>-2</sup> /1000 h                     | 99.3%/200/1 C                                                        | [5]       |
| PEG/LiMTFSI/PC                            | In-situ thermal polymerization               | N                               | 25         | 0.1                             | not mentioned                                       | 98%/100/0.1 C                                                        | [6]       |
| PEG/LiTFSI/LLZTO                          | Solution casting                             | Y                               | 20         | 0.22                            | 0.5 mA cm <sup>-2</sup> /125 h                      | 88%/150/0.1 C                                                        | [7]       |
| PEG/LiTFSI/SiO <sub>2</sub>               | Rheology tuning UV polymerization            | Y                               | 27         | 0.68                            | 0.1 mA cm <sup>-2</sup> /1400 h                     | 92.3%/250/0.5 C                                                      | This work |

**Table S2.** Detailed information of RTS- $x$ % SiO<sub>2</sub> QPE ( $x=0, 3$ , and 5)

| Quasi-polymer<br>electrolytes | PEGMEA<br>(g) | TMU<br>(g) | PEGDA<br>(g) | 651<br>(g) | LiTFSI<br>(g) | SiO <sub>2</sub><br>(g) | LiTFSI<br>(wt%) | SiO <sub>2</sub><br>(wt%) |
|-------------------------------|---------------|------------|--------------|------------|---------------|-------------------------|-----------------|---------------------------|
| RTS-0% SiO <sub>2</sub>       | 0.4           | 0.75       | 0.24         | 0.01       | 0.5           | 0                       | 26.32           | 0                         |
| RTS-3% SiO <sub>2</sub>       | 0.4           | 0.75       | 0.24         | 0.01       | 0.5           | 0.06                    | 25.51           | 3                         |
| RTS-5% SiO <sub>2</sub>       | 0.4           | 0.75       | 0.24         | 0.01       | 0.5           | 0.1                     | 25              | 5                         |

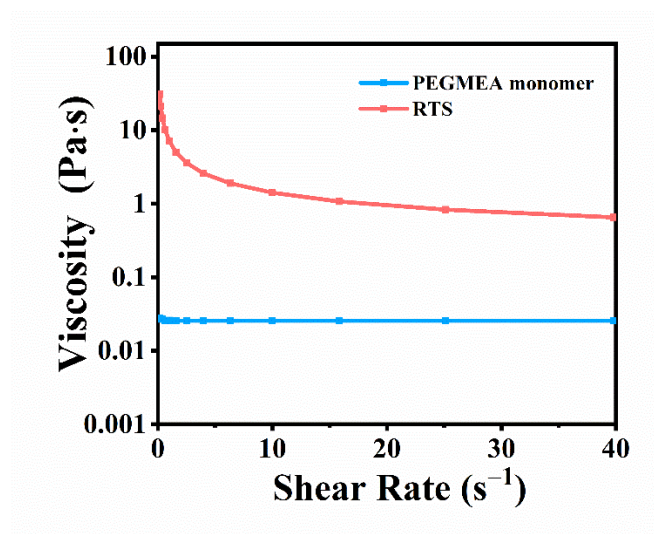

**Figure S1.** Viscosity curves of PEGMEA monomer and RTS.

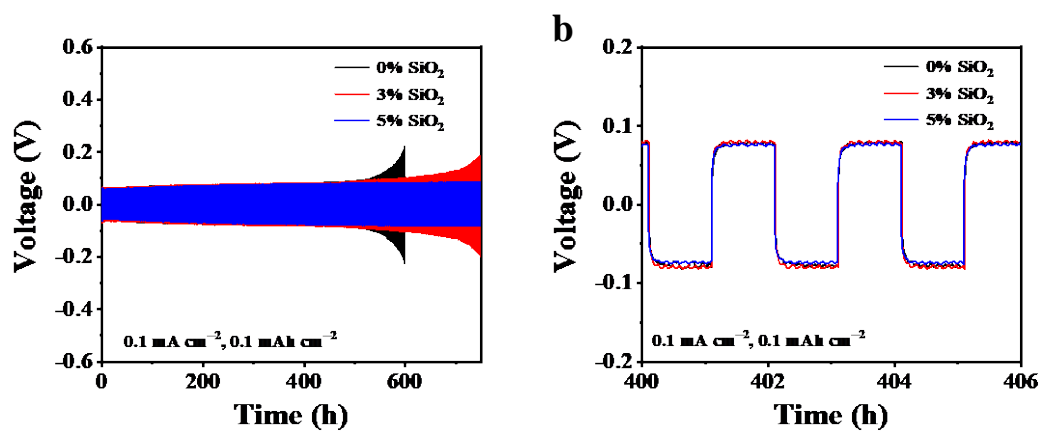

**Figure S2.** (a) Galvanostatic charge-discharge curves of Li//Li symmetric cells with RTS- $x\%$  SiO<sub>2</sub> QPE ( $x=0, 3$ , and  $5$ ) at  $0.1 \text{ mA cm}^{-2}$  and  $0.1 \text{ mAh cm}^{-2}$ ; (b) Zoom-in curves of 400–406 hours.

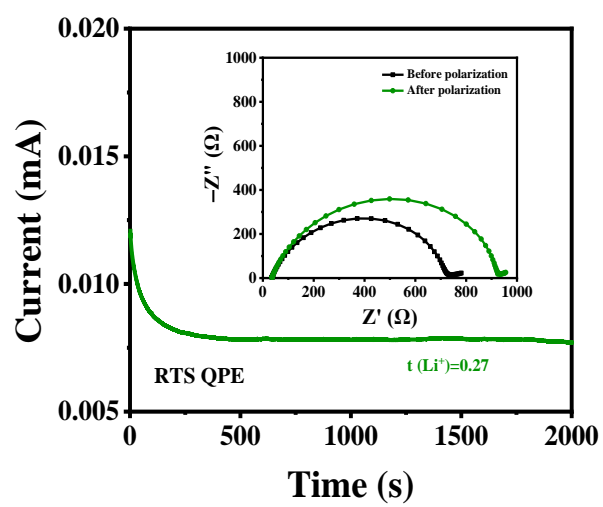

**Figure S3.** Chronoamperometry polarization curve as well as the impedance spectra before and after polarization of Li/RTS QPE/Li cell.

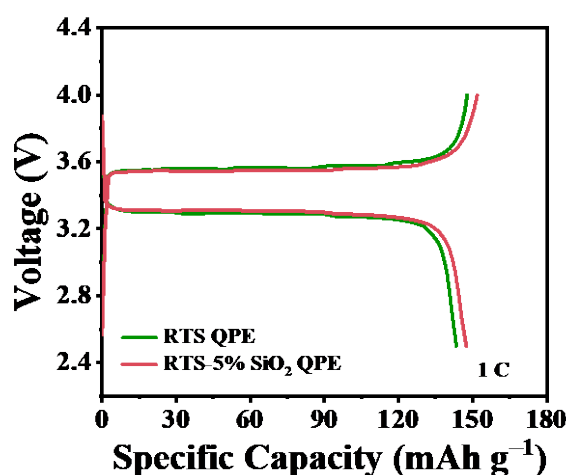

**Figure S4.** Initial galvanostatic charge/discharge curves of LiFePO<sub>4</sub>//Li cells at 1 C.

## References

1. Yuan, B.; Luo, G.; Liang, J.; Cheng, F.; Zhang, W.; Chen, J., Self-assembly synthesis of solid polymer electrolyte with carbonate terminated poly(ethylene glycol) matrix and its application for solid state lithium battery. *Journal of Energy Chemistry* 2019, 38, 55-59.
2. Pei, D.; Ma, R.; Yang, G.; Li, Y.; Huang, C.; Liu, Z.; Huang, S.; Cao, G.; Jin, H., Enhanced ion transport behaviors in composite polymer electrolyte: the case of a looser chain folding structure. *Journal of Materials Chemistry A* 2022, 10, (6), 3226-3232.
3. Li, Y.; Sun, Z.; Liu, D.; Gao, Y.; Wang, Y.; Bu, H.; Li, M.; Zhang, Y.; Gao, G.; Ding, S., A composite solid polymer electrolyte incorporating MnO<sub>2</sub> nanosheets with reinforced mechanical properties and electrochemical stability for lithium metal batteries. *Journal of Materials Chemistry A* 2020, 8, (4), 2021-2032.
4. Tseng, Y.-C.; Hsiang, S.-H.; Tsao, C.-H.; Teng, H.; Hou, S.-S.; Jan, J.-S., In situ formation of polymer electrolytes using a dicationic imidazolium cross-linker for high-performance lithium ion batteries. *Journal of Materials Chemistry A* 2021, 9, (9), 5796-5806.
5. Atik, J.; Diddens, D.; Thienenkamp, J. H.; Brunklaus, G.; Winter, M.; Paillard, E., Cation-Assisted Lithium-Ion Transport for High-Performance PEO-based Ternary Solid Polymer Electrolytes. *Angewandte Chemie International Edition* 2021, 60, (21), 11919-11927.
6. Porcarelli, L.; Shaplov, A. S.; Bella, F.; Nair, J. R.; Mecerreyes, D.; Gerbaldi, C., Single-Ion Conducting Polymer Electrolytes for Lithium Metal Polymer Batteries that Operate at Ambient Temperature. *ACS Energy Letters* 2016, 1, (4), 678-682.
7. Huo, H.; Zhao, N.; Sun, J.; Du, F.; Li, Y.; Guo, X., Composite electrolytes of polyethylene oxides/garnets interfacially wetted by ionic liquid for room-temperature solid-state lithium battery. *Journal of Power Sources* 2017, 372, 1-7.
